# Supplementary material for: Combined Kinetic Studies and Computational Analysis on Kojic Acid Analogs as Tyrosinase Inhibitors
Source: PubMed Central journal article supplement (PMC6271673; doi:10.3390/molecules19079591), 2014-07-07

## Supporting Information

**Table S1.** Root mean square deviation (RMSD) obtained by MD simulations for all inhibitors. The standard deviations are in parenthesis.

| <b>Inhibitor</b> | <b>RMSD (Å)</b> |
|------------------|-----------------|
| Tropolone        | 1.02 (0.18)     |
| KA               | 0.67 (0.27)     |
| INH1             | 0.91 (0.23)     |
| INH2             | 1.28 (0.13)     |
| INH3             | 1.87 (0.36)     |
| INH4             | 0.74 (0.37)     |

**Figure S1.** Re-docking result of crystal inhibitor obtained by MVD software.

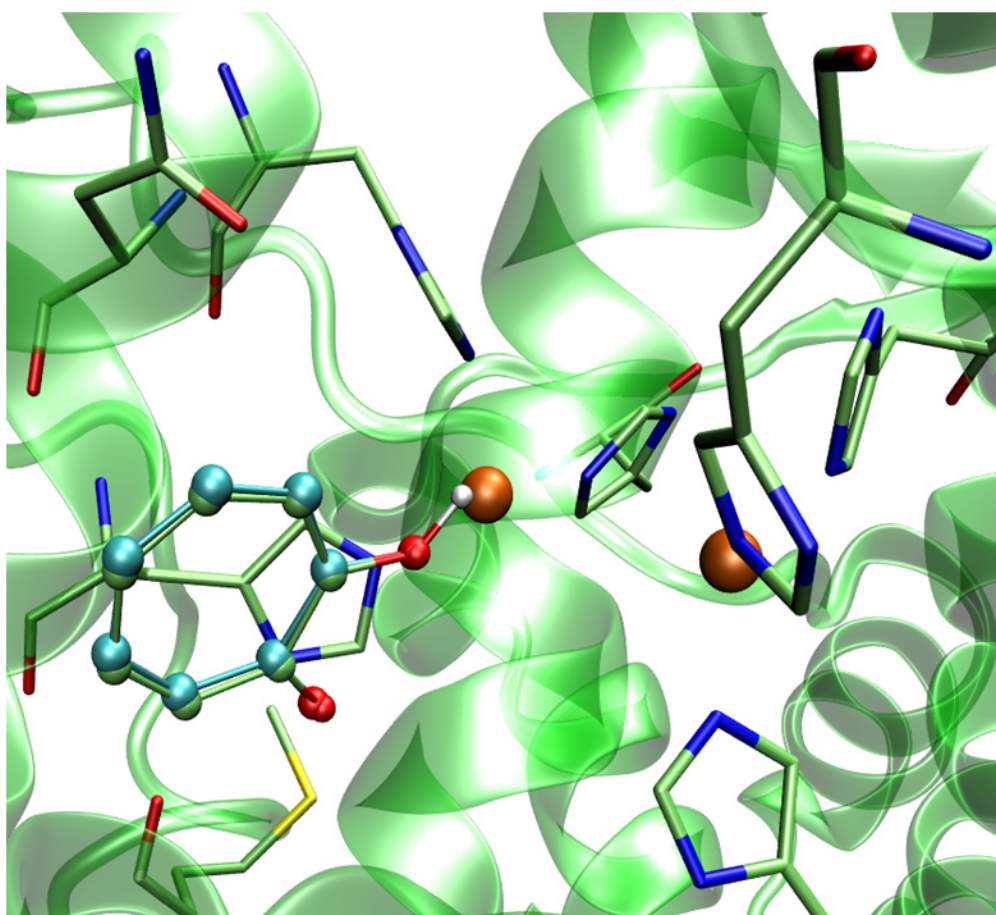

**Figure S2.** Docking results of Kojic Acid and its analogous obtained by MVD software.

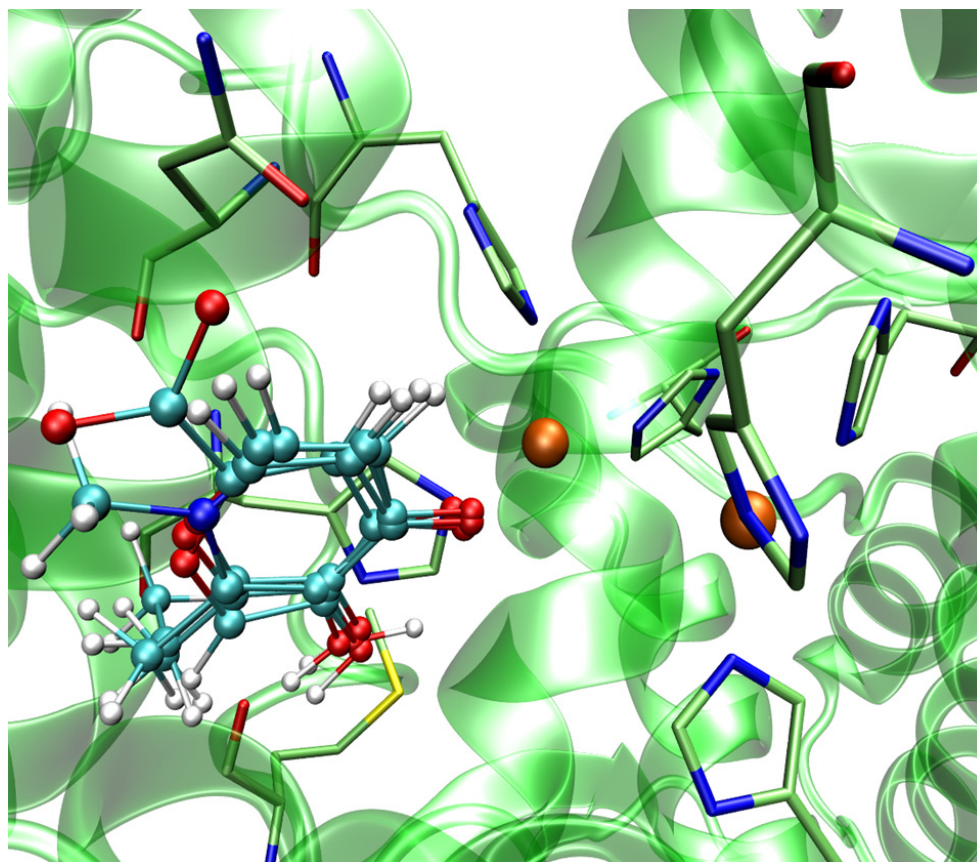

Supplement: molecules-19-09591-s001.pdf [file molecules-19-09591-s001.pdf]
